# Supplementary material
Source: publisher figshare collection journal article supplement (https://frontiersin.figshare.com/ndownloader/files/14991593)
Supplement: Supplementary file [file 14991593]

**Supplementary Table 1**

| <b>RESUMEQ NETWORK</b>                                       |            |                                    |                        |
|--------------------------------------------------------------|------------|------------------------------------|------------------------|
| <b>Thesaurus of the causes of equine mortality</b>           |            |                                    |                        |
| Age categories: Fetus, stillborn, ]0 - 24h], ]24h - 1 month] |            |                                    |                        |
| fetus                                                        | infectious | macroscopic placentitis            | bacterial              |
|                                                              |            |                                    | mycotic                |
|                                                              |            |                                    | bacterial and mycotic  |
|                                                              |            |                                    | unidentified pathogen  |
|                                                              |            |                                    | no search for pathogen |
|                                                              |            | absence of macroscopic placentitis | bacterial              |
|                                                              |            |                                    | unidentified pathogen  |
|                                                              |            |                                    | no search for pathogen |
|                                                              |            |                                    | viral (not herpes)     |
|                                                              |            | Rhinopneumonitis                   | EHV1                   |
|                                                              |            |                                    | EHV4                   |
|                                                              |            | Leptospirosis                      |                        |
|                                                              |            | absence of placenta                | bacterial              |
|                                                              |            |                                    | unidentified pathogen  |
|                                                              |            |                                    | no search for pathogen |
|                                                              |            |                                    | viral (not herpes)     |

|  |                  |                                      |  |
|--|------------------|--------------------------------------|--|
|  | non infectious   | umbilical cord twist                 |  |
|  |                  | hydrops of fetal membranes           |  |
|  |                  | placental insufficiency              |  |
|  |                  | premature detachment of the placenta |  |
|  |                  | twin pregnancy                       |  |
|  |                  | pregnancy in the placental body      |  |
|  |                  | strangulation by the umbilical cord  |  |
|  |                  | congenital abnormalities             |  |
|  |                  | traumatic                            |  |
|  |                  | other                                |  |
|  |                  | abnormal umbilical cord              |  |
|  | unknown etiology |                                      |  |

|           |            |                                    |                        |
|-----------|------------|------------------------------------|------------------------|
| stillborn | infectious | macroscopic placentitis            | bacterial              |
| ]0 - 24h] |            |                                    | mycotic                |
|           |            |                                    | bacterial and mycotic  |
|           |            |                                    | unidentified pathogen  |
|           |            |                                    | no search for pathogen |
|           |            | absence of macroscopic placentitis | bacterial              |
|           |            |                                    | viral (not herpes)     |
|           |            |                                    | unidentified pathogen  |
|           |            |                                    | no search for pathogen |
|           |            | Rhinopneumonitis                   | EHV1                   |
|           |            |                                    | EHV4                   |
|           |            | Leptospirosis                      |                        |
|           |            | absence of placenta                | bacterial              |
|           |            |                                    | unidentified pathogen  |
|           |            |                                    | no search for pathogen |
|           |            |                                    | viral (not herpes)     |
|           |            |                                    |                        |

|  |                  |                                                      |  |
|--|------------------|------------------------------------------------------|--|
|  | non infectious   | umbilical cord twist                                 |  |
|  |                  | hydrops of fetal membranes                           |  |
|  |                  | placental insufficiency                              |  |
|  |                  | premature detachment of the placenta                 |  |
|  |                  | twin pregnancy                                       |  |
|  |                  | pregnancy in the placental body                      |  |
|  |                  | strangulation by the umbilical cord                  |  |
|  |                  | congenital abnormality                               |  |
|  |                  | anoxia/asphyxia                                      |  |
|  |                  | premature birth/ dismaturity                         |  |
|  |                  | premature rupture of the umbilical cord (hemorrhage) |  |
|  |                  | fracture of the skull                                |  |
|  |                  | fracture of the ribs (hemorrhage)                    |  |
|  |                  | other                                                |  |
|  |                  | tamponade                                            |  |
|  |                  | dystocia                                             |  |
|  | unknown etiology |                                                      |  |

|                   |            |                            |                        |
|-------------------|------------|----------------------------|------------------------|
| ]24h- 1 week]     | infectious | septicemia                 | bacterial              |
| ]1 week- 1 month] |            |                            | viral (not herpes)     |
|                   |            |                            | unidentified pathogen  |
|                   |            |                            | no search for pathogen |
|                   |            | Rhinopneumonitis           | EHV1                   |
|                   |            |                            | EHV4                   |
|                   |            | bronchopneumonia-pneumonia | no search for pathogen |
|                   |            |                            | unidentified pathogen  |
|                   |            |                            | bacterial              |
|                   |            |                            |                        |
|                   |            |                            | viral (not herpes)     |
|                   |            |                            |                        |

|  |  |                  |                        |
|--|--|------------------|------------------------|
|  |  | enteritis        | bacterial              |
|  |  |                  | viral                  |
|  |  |                  | no search for pathogen |
|  |  |                  | unidentified pathogen  |
|  |  | enterocolitis    | bacterial              |
|  |  |                  | viral                  |
|  |  |                  | unidentified pathogen  |
|  |  |                  | no search for pathogen |
|  |  | typhlocolitis    | bacterial              |
|  |  |                  | viral                  |
|  |  |                  | unidentified pathogen  |
|  |  |                  | no search for pathogen |
|  |  | colitis          | bacterial              |
|  |  |                  | viral                  |
|  |  |                  | unidentified pathogen  |
|  |  |                  | no search for pathogen |
|  |  | meningitis       | bacterial              |
|  |  |                  | viral                  |
|  |  |                  | unidentified pathogen  |
|  |  |                  | no search for pathogen |
|  |  | osteomyelitis    | bacterial              |
|  |  |                  | unidentified pathogen  |
|  |  |                  | no search for pathogen |
|  |  | polyarthrits     | bacterial              |
|  |  |                  | unidentified pathogen  |
|  |  |                  | no search for pathogen |
|  |  | myositis         | bacterial              |
|  |  |                  | unidentified pathogen  |
|  |  |                  | no search for pathogen |
|  |  | Tyzzar's disease |                        |

|  |                  |                                        |  |
|--|------------------|----------------------------------------|--|
|  | non infectious   | anoxia/asphyxia                        |  |
|  |                  | premature / immaturity                 |  |
|  |                  | isoerythrolysis in neonatal foal       |  |
|  |                  | congenital abnormality                 |  |
|  |                  | perforating ulcer                      |  |
|  |                  | tamponade                              |  |
|  |                  | hemorrhage                             |  |
|  |                  | gastrocnemius muscle rupture           |  |
|  |                  | anaphylatic shock                      |  |
|  |                  | fracture of the skull                  |  |
|  |                  | fracture of the ribs (hemorrhage)      |  |
|  |                  | other                                  |  |
|  |                  | acute pulmonary edema                  |  |
|  |                  | nutritional myopathy                   |  |
|  |                  | rupture of the urinary bladder         |  |
|  |                  | polytraumatism                         |  |
|  |                  | intussusception of the small intestine |  |
|  | unknown etiology |                                        |  |
